# Supplementary material
Source: publisher figshare collection journal article supplement (https://frontiersin.figshare.com/ndownloader/files/33961913)
Supplement: Supplementary file 1 [file 33961913]

## Sheet: Sheet1
产水200方/d									产水150方/d				产水100方/d
泵压12MPa	浓度	井口压力	泵压13MPa	井口压力	泵压11	井口压力			泵压12MPa	浓度	井口压力		泵压12MPa	浓度	井口压力					浓度	n	K	f
	0.12	0.319062		1.31906		-0.680938				0.12	0.323418			0.12	0.329575
	0.1	0.621436		1.62143		-0.378564				0.1	0.677145			0.1	0.747198					0.1205	0.00887	2.03794	300.039
	0.08	0.977616		1.97762		-0.0223836				0.08	1.02072			0.08	1.06913					0.12	0.0168	1.96963	297.813
	0.06	1.16954		2.16954		0.169543				0.06	1.18422			0.06	1.19893					0.1	0.334	0.44167	443.422
	0.04	1.22444		2.22444		0.224436				0.04	1.22604			0.04	1.22761					0.08	0.6512	0.0708657	1063.66
	0.02	1.22844		2.22844		0.228436				0.02	1.22884			0.02	1.22918					0.06	0.9684	0.00669789	4422.04
	0	1.22981		2.22841		0.229813				0	1.22981			0	1.22984					0.04	1.2856	0.000240985	48650.6
																				0.02	1.6028	8.19491e-07	5.68278e+06
																				0	1.92	0	#DIV/0!
